# Supplementary material for: Mono-, bi- and tri-metallic Fe-based platinum group metal-free electrocatalysts derived from phthalocyanine for oxygen reduction reaction in alkaline media
Source: Royal Society of Chemistry journal article supplement (doi:10.1039/d4nr00575a), 2024-01-01
Supplement: d4nr00575a1.pdf [file d4nr00575a1.pdf]

## SUPPORTING INFORMATION

### Mono-, bi- and tri-metallic Fe-based platinum group metal-free electrocatalysts derived from phthalocyanine for oxygen reduction reaction in alkaline media

<sup>1</sup>Seyed Ariana Mirshokraee, <sup>1</sup>Mohsin Muhyuddin, <sup>1</sup>Jacopo Orsilli, <sup>2</sup>Enrico Berretti, <sup>2</sup>Alessandro Lavacchi, <sup>3</sup>Carmelo Lo Vecchio, <sup>3</sup>Vincenzo Baglio, <sup>4</sup>Rosanna Viscardi, <sup>5</sup>Andrea Zaffora, <sup>5</sup>Francesco Di Franco, <sup>5</sup>Monica Santamaria, <sup>6</sup>Luca Olivi, <sup>6,7</sup>Simone Pollastri, <sup>1</sup>Carlo Santoro\*

<sup>1</sup> Department of Materials Science, University of Milano-Bicocca, U5, Roberto Cozzi, 55 20125, Milan MI, Italy

<sup>2</sup> Istituto di Chimica Dei Composti OrganoMetallici (ICCOM), Consiglio Nazionale Delle Ricerche (CNR), Via Madonna Del Piano 10, 50019 Sesto Fiorentino, Firenze, Italy

<sup>3</sup> Istituto di Tecnologie Avanzate per l'Energia "Nicola Giordano" (ITAE), Consiglio Nazionale delle Ricerche (CNR), Via Salita S. Lucia sopra Contesse 5, Messina, 98126, Italy

<sup>4</sup> Casaccia Research Center, ENEA, Santa Maria di Galeria, 00123, Rome, Italy

<sup>5</sup> Department of Engineering, University of Palermo, Viale delle Scienze, 90128, Palermo, Italy

<sup>6</sup> Elettra-Sincrotrone Trieste, Area Science Park, Basovizza, Trieste, Italy

<sup>7</sup> Department of Physics, Computer Science and Mathematics, University of Modena and Reggio Emilia, Via Campi 103, 41125 Modena, Italy

\*Corresponding author: [carlo.santoro@unimib.it](mailto:carlo.santoro@unimib.it)

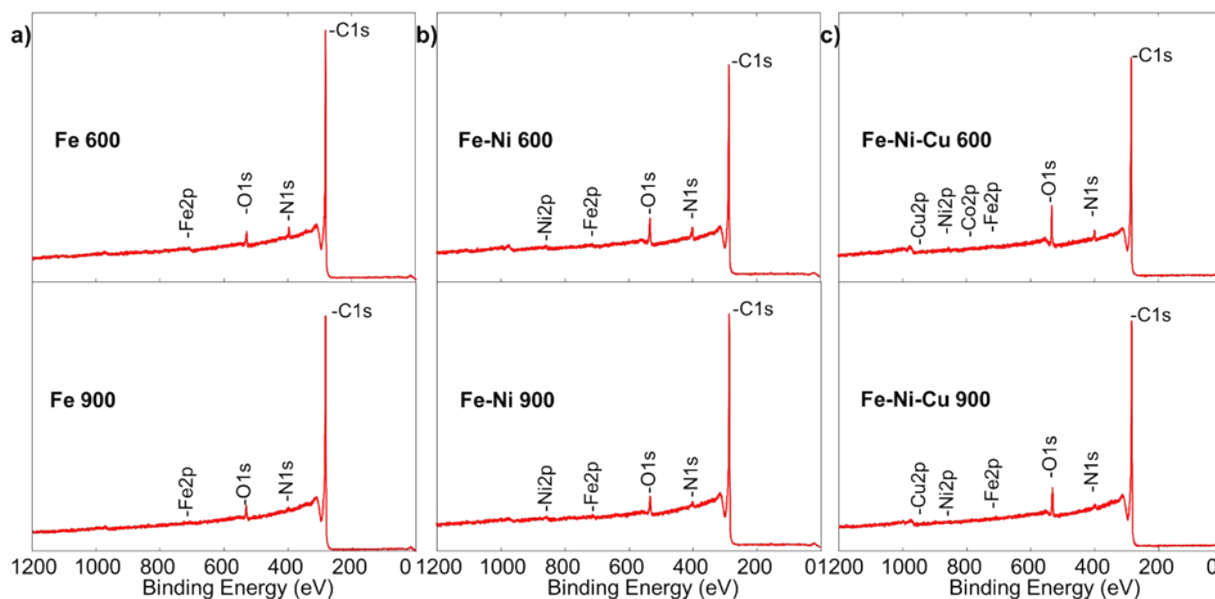

**Figure S1:** XPS survey spectra for a) Fe 600 and Fe 900, b) Fe-Ni 600 and Fe-Ni 900 and c) Fe-Ni-Cu 600 and Fe-Ni-Cu 900.

**Table S1.** Atomic percentage of C1s, N1s, Fe2p<sub>3/2</sub>, Ni2p<sub>3/2</sub>, Cu2p<sub>3/2</sub> and O1s in the KB-supported catalysts derived from XPS analyses.

| Catalysts           | C (1s) | N (1s) | Fe (2p <sub>3/2</sub> ) | Cu (2p <sub>3/2</sub> ) | Ni (2p <sub>3/2</sub> ) | O (1s) |
|---------------------|--------|--------|-------------------------|-------------------------|-------------------------|--------|
| <b>Fe 600</b>       | 93.4   | 3.2    | 0.3                     | -                       | -                       | 3.1    |
| <b>Fe 900</b>       | 95.7   | 1.6    | 0.3                     | -                       | -                       | 2.4    |
| <b>Fe-Ni 600</b>    | 89.4   | 4.4    | 0.2                     | -                       | 0.3                     | 5.7    |
| <b>Fe-Ni 900</b>    | 94     | 2.0    | 0.1                     | -                       | 0.1                     | 3.8    |
| <b>Fe-Ni-Cu 600</b> | 89.4   | 3.0    | 0.2                     | 0.3                     | 0.1                     | 7.0    |
| <b>Fe-Ni-Cu 900</b> | 91.9   | 2.4    | ~0.1                    | ~0.1                    | <0.1                    | 5.5    |

**Table S2.** Composition of nitrogen from N1s deconvolution spectra.

| KB-supported Catalysts | Composition of N (relative %) |                              |                      |                                   |                     |                      |               |
|------------------------|-------------------------------|------------------------------|----------------------|-----------------------------------|---------------------|----------------------|---------------|
|                        | N (at. %)                     | I <sub>mine</sub> (397.7 eV) | Pyridinic (398.3 eV) | N-M (M=Fe, Cu, Ni) (399.1 eV±0.1) | Pyrrolic (400.9 eV) | Graphitic (402.1 eV) | N-O (>403 eV) |
| <b>Fe 600</b>          | 3.2                           | -                            | 35.9                 | 45.5                              | 10.6                | 8.0                  | -             |
| <b>Fe 900</b>          | 1.6                           | -                            | 29.3                 | 32.5                              | 38.2                | -                    | -             |
| <b>Fe-Ni 600</b>       | 4.4                           | -                            | 23.1                 | 59.9                              | 15.0                | 2.0                  | -             |
| <b>Fe-Ni 900</b>       | 2.0                           | -                            | 29.3                 | 31.8                              | 35.6                | 3.3                  | -             |
| <b>Fe-Ni-Cu 600</b>    | 3.0                           | -                            | 37.9                 | 50.7                              | 11.4                | -                    | -             |
| <b>Fe-Ni-Cu 900</b>    | 2.4                           | -                            | 35.2                 | 1.8                               | 63.0                | -                    | -             |

**Table S3.** Composition of nitrogen from C1s deconvolution spectra.

| Catalysts           | Composition of C (relative %) |                      |                              |                        |                          |                |                 |
|---------------------|-------------------------------|----------------------|------------------------------|------------------------|--------------------------|----------------|-----------------|
|                     | C (at. %)                     | Graphitic (284.3 eV) | Secondary carbons (285.0 eV) | C-N defects (286.2 eV) | C-OH and C-OC (287.1 eV) | C=O (288.0 eV) | COOH (289.4 eV) |
| <b>Fe 600</b>       | 93.4                          | 63.9                 | 22.0                         | 5.5                    | 2.0                      | 2.0            | 4.6             |
| <b>Fe 900</b>       | 95.7                          | 55.3                 | 29.0                         | 4.5                    | 3.6                      | 1.1            | 6.5             |
| <b>Fe-Ni 600</b>    | 89.4                          | 57.1                 | 28.7                         | 5.9                    | 1.9                      | 2.6            | 3.8             |
| <b>Fe-Ni 900</b>    | 94                            | 54.9                 | 30.5                         | 3.8                    | 3.9                      | 1.4            | 5.5             |
| <b>Fe-Ni-Cu 600</b> | 89.4                          | 40.6                 | 40.6                         | 7.9                    | 1.7                      | 4.1            | 5.1             |
| <b>Fe-Ni-Cu 900</b> | 91.9                          | 44.8                 | 40.7                         | 4.3                    | 2.9                      | 3.1            | 4.2             |

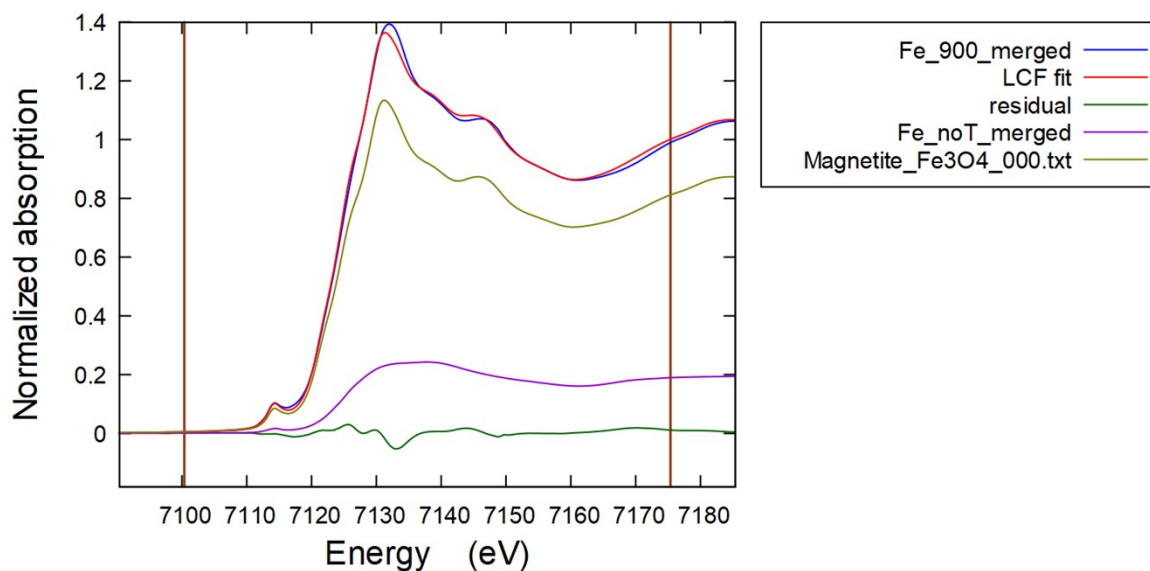

**Figure S2:** Spectrum of the sample treated at 900 °C (blue line) with the best LC fit (red line) obtained using 81%  $\text{Fe}_3\text{O}_4$  (yellowish line) and 19% pristine Fe(Pc)/C (violet line).

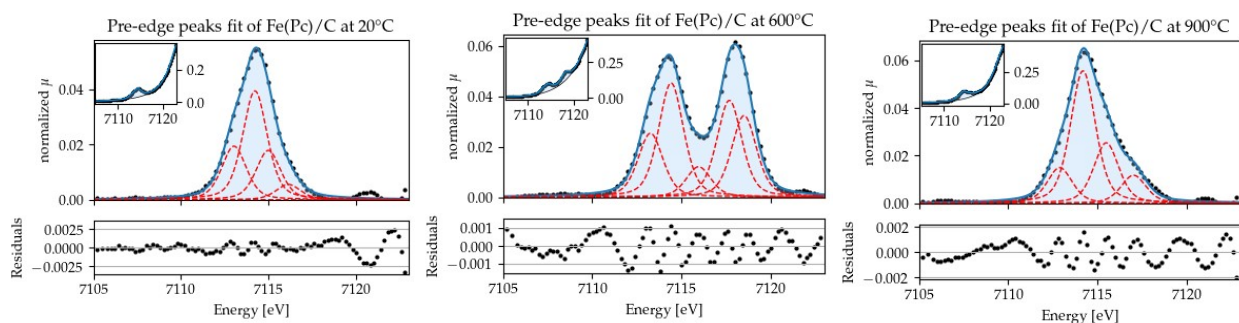

**Figure S3:** Pre-edge peaks fit: Black dots are the experimental data, blue lines the total fitted area, and in red the single components used. Upper-left small plate, the fit without the background subtraction.

**Table S4.** Onset-potential, half-potential, and limiting current density belong to the Fe-based electrocatalysts with the different (wt.%) of the FePc

| <b>Sample</b>       | <b>Onset-potential<br/>(V)</b> | <b>Half-potential<br/>(V)</b> | <b>Limiting current<br/>density (mA cm<sup>-2</sup>)</b> |
|---------------------|--------------------------------|-------------------------------|----------------------------------------------------------|
| <b>Fe (30%) 600</b> | 0.96                           | 0.90                          | 6.2                                                      |
| <b>Fe (30%) 900</b> | 0.96                           | 0.84                          | 5.2                                                      |
| <b>Fe (20%) 600</b> | 0.95                           | 0.88                          | 5.8                                                      |
| <b>Fe (20%) 900</b> | 0.95                           | 0.83                          | 5.4                                                      |
| <b>Fe (10%) 600</b> | 0.94                           | 0.86                          | 5.2                                                      |
| <b>Fe (10%) 900</b> | 0.89                           | 0.75                          | 5.5                                                      |
| <b>Pt/C</b>         | 0.98                           | 0.85                          | 5                                                        |

**Table S5:** Onset-potential, half-potential, and limiting current density belong to the Fe-based electrocatalysts with the different mono/bi/tri-metallic precursors.

| <b>Sample</b>       | <b>Onset-potential<br/>(V)</b> | <b>Half-potential<br/>(V)</b> | <b>Limiting current<br/>density (mA cm<sup>-2</sup>)</b> |
|---------------------|--------------------------------|-------------------------------|----------------------------------------------------------|
| <b>Fe 600</b>       | 0.96                           | 0.90                          | 5.3                                                      |
| <b>Fe 900</b>       | 0.96                           | 0.84                          | 5.6                                                      |
| <b>Fe-Ni 600</b>    | 0.89                           | 0.78                          | 4.5                                                      |
| <b>Fe-Ni 900</b>    | 0.88                           | 0.76                          | 4.9                                                      |
| <b>Fe-Ni-Cu 600</b> | 0.96                           | 0.90                          | 5                                                        |
| <b>Fe-Ni-Cu 900</b> | 0.93                           | 0.81                          | 5                                                        |
| <b>Pt/C</b>         | 0.98                           | 0.85                          | 5                                                        |

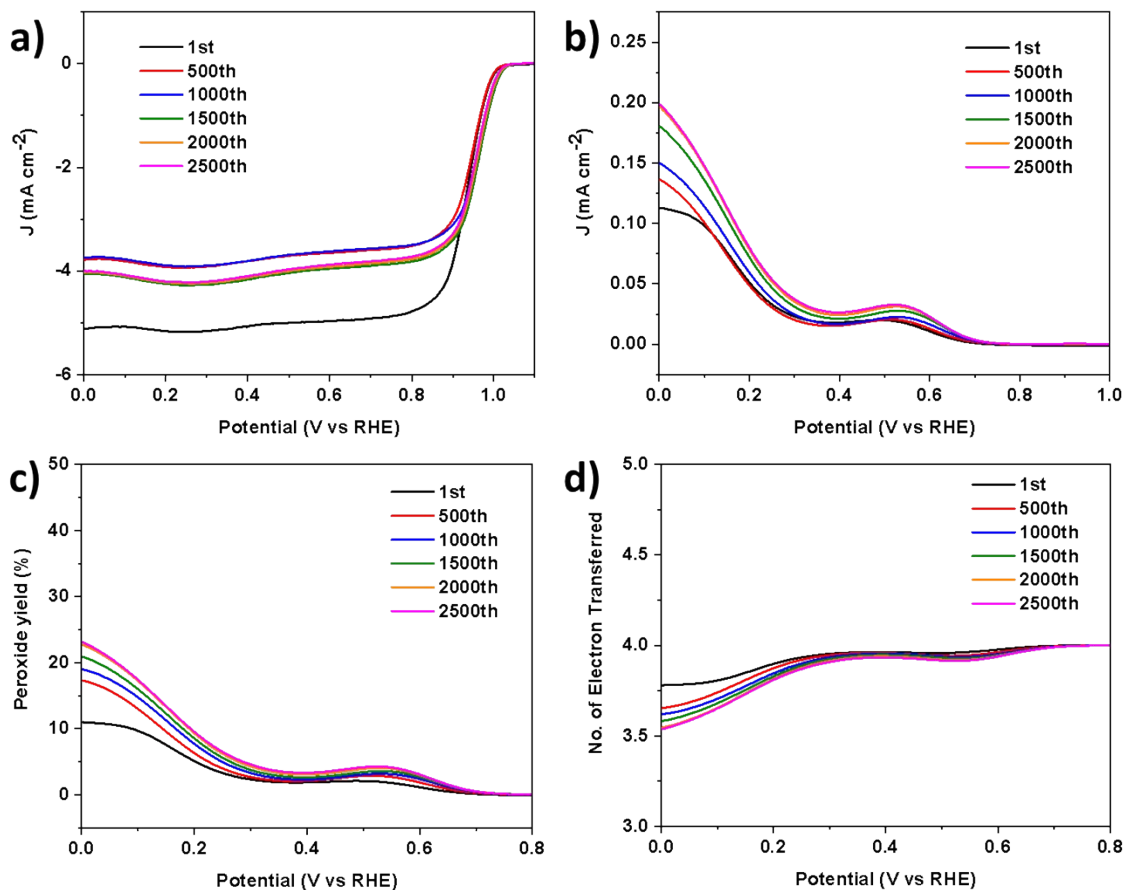

**Figure S4.** Accelerated ORR stability test performed over Fe 600 with the scan rate of 5 mVs<sup>-1</sup> in O<sub>2</sub> saturated 0.1 M KOH while operating RRDE at 1600 rpm; a) LSV for disk current, b) Ring current, c) Peroxide anion yield, and d) Number of electrons transferred. Pt/C in all plots is the benchmark.

| Sample          | E <sub>on</sub><br>(V) | E <sub>1/2</sub><br>(V) | limited current<br>density (J <sub>d</sub> )<br>(mA cm <sup>-2</sup> ) | Solution                | cite      |
|-----------------|------------------------|-------------------------|------------------------------------------------------------------------|-------------------------|-----------|
| FeCoNi-CNF      | -                      | 0.77                    | -                                                                      | 0.1 M KOH               | [1]       |
| Fe-BP(N)        | 0.95                   | 0.84                    | -6.1                                                                   | 0.1 M KOH               | [2]       |
| Poly-FePc       | 0.98                   | 0.91                    | -5.49                                                                  | 0.1 M KOH               | [3]       |
| PPcFeCo/3D-G    |                        | 0.89                    | -5.4                                                                   | 0.1 M KOH               | [4]       |
| CMP-CoFe/C      | 0.95                   | 0.83                    | -6.5                                                                   | 0.1 M KOH               | [5]       |
| FePc-PcFe       | 0.80                   | 0.59                    | -                                                                      | 0.1 M HClO <sub>4</sub> | [6]       |
| CoFe-COP/OMC    | 0.90                   | -                       | -5.35                                                                  | 0.1 M KOH               | [7]       |
| Fe/12Zn/CoNCNTs | 1.02                   | 0.88                    | -5.59                                                                  | 0.1 M KOH               | [8]       |
| Fe 600          | 0.96                   | 0.90                    | -5.3                                                                   | 0.1 M KOH               | This work |
| Fe-Ni-Cu 600    | 0.96                   | 0.90                    | -5                                                                     | 0.1 M KOH               | This work |

**Table S6:** Comparison of ORR performance with similar electrocatalysts in other articles

### Reference

1. K. Muuli, R. Kumar, M. Mooste, V. Gudkova, A. Treshchalov, H.-M. Piirsoo, A. Kikas, J. Aruväli, V. Kisand and A. Tamm, *Materials*, 2023, **16**, 4626.
2. M. A. C. De Oliveira, V. C. Ficca, R. Gokhale, C. Santoro, B. Mecheri, A. D'epifanio, S. Licoccia and P. Atanassov, *Journal of Solid State Electrochemistry*, 2021, **25**, 93-104.
3. A. Kumar, G. Yasin, M. Tabish, D. K. Das, S. Ajmal, A. K. Nadda, G. Zhang, T. Maiyalagan, A. Saad and R. K. Gupta, *Chemical Engineering Journal*, 2022, **445**, 136784.
4. S. Wang, Z. Li, W. Duan, P. Sun, J. Wang, Q. Liu, L. Zhang and Y. Zhuang, *Journal of Energy Chemistry*, 2023, **86**, 41-53.
5. H. Li and Z. Sui, *New Journal of Chemistry*, 2019, **43**, 17963-17973.
6. X. Wang, Y. Liu, Y. Wang, R. Ren, H. Chen, Z. Jiang and Q. He, *Chemelectrochem*, 2018, **5**, 3478-3485.
7. Y. Mo, G. Liu, S. Liu and W. Lu, *ACS Applied Nano Materials*, 2023.
8. J. Xue, S. Deng, R. Wang and Y. Li, *Carbon*, 2023, **205**, 422-434.
